# Supplementary material for: Comparative analysis of transvaginal and transabdominal sliding sign for predicting intra-abdominal adhesions prior to repeat cesarean section: a single center study
Source: PeerJ. 2026 Jan 9;14:e20551. doi: 10.7717/peerj.20551 (PMC12794639; doi:10.7717/peerj.20551)
Supplement: Supplemental Information 1 [file peerj-14-20551-s001.xlsx]

## Sheet: Sheet1
No.	Date	Research Findings			Follow Up
		Transabdominal US	Transvaginal US	Keloid	Date of delivery	Adhesion	Incision
1	2020-09-18	-	-	+	2020-11-25	+	pfannensteil
2	2020-10-01	-	-	+	2020-10-16	+	mediana
3	2020-10-12	-	-	+	2020-09-25	+	pfannensteil
4	2020-10-21	+	+	+	2021-02-02	-	pfannensteil
5	2020-11-12	+	+	+	2020-11-16	-	pfannensteil
6	2020-12-21	+	+	-	2020-12-23	-	mediana
7	2021-01-08	+	+	-	2021-01-08	-	pfannensteil
8	2021-01-09	-	-	+	2021-01-06	+	pfannensteil
9	2021-01-16	-	-	+	2021-02-18	+	pfannensteil
10	2021-01-25	-	-	+	2021-01-27	+	pfannensteil
11	2021-02-16	+	+	-	2021-02-25	-	pfannensteil
12	2021-02-16	-	-	+	2021-02-19	+	pfannensteil
13	2021-02-23	-	-	+	2021-02-25	+	mediana
14	2021-02-26	-	-	+	2021-02-28	+	pfannensteil
15	2021-03-06	+	+	+	2021-04-19	-	pfannensteil
16	2021-03-15	-	-	-	2021-03-19	+	pfannensteil
17	2021-03-22	+	+	-	2021-03-24	-	pfannensteil
18	2021-03-25	-	-	+	2021-03-25	+	pfannensteil
19	2021-03-25	-	-	+	2021-03-25	+	pfannensteil
20	2021-06-07	-	-	+	2021-06-11	+	mediana
21	2021-06-08	+	+	-	2021-07-04	-	pfannensteil
22	2021-06-09	+	+	+	2021-06-30	+	pfannensteil
23	2021-06-09	+	+	-	2021-06-11	-	pfannensteil
24	2021-06-14	+	+	+	2021-07-17	-	pfannensteil
25	2021-06-14	-	-	+	2021-06-16	+	pfannensteil
26	2021-06-21	-	-	-	2021-06-23	-	pfannensteil
27	2021-06-24	+	+	-	2021-06-24	-	pfannensteil
28	2021-06-24	+	-	+	2021-06-25	-	pfannensteil
29	2021-06-23	-	-	-	2021-06-27	-	pfannensteil
30	2021-06-30	+	+	-	2021-06-30	-	pfannensteil
31	2021-07-19	+	+	+	7071-07-19	-	pfannensteil
32	2021-07-21	+	+	-	2021-08-09	-	pfannensteil
33	2021-07-26	-	+	-	2021-08-09	-	pfannensteil
34	2021-08-02	+	+	-	2021-08-04	-	pfannensteil
35	2021-08-02	-	-	-	2021-08-12	+	pfannensteil
